# Supplementary material
Source: publisher figshare collection journal article supplement (https://tandf.figshare.com/articles/dataset/_/28323614)
Supplement: Supplementary file 1 [file 1]

# Dra. Brenda Viridiana Rabago Barajas

Department of Applied Psychology, University Center for Health Sciences, University of

Guadalajara, Guadalajara, Jalisco 44340, Mexico.

Cover Letter

**Date: June 2024**

# Dear Editor

We wish to submit an original research article entitled “Characterization of Executive Functioning in subjects post COVID-19 infection in Mexico.” for consideration by **Applied Neuropsychology**: **Adult**

We confirm that this work is original and has not been published elsewhere, nor is it currently under consideration for publication elsewhere.

We believe that this manuscript is appropriate for publication by this Journal

We have no conflicts of interest to disclose.

Please address all correspondence concerning this manuscript to me at (brenda.rabago@gmail.com)

Thank you for your consideration of this manuscript. Sincerely,

Brenda Rabago.
